# Supplementary material
Source: MDPI journal article supplement (https://www.mdpi.com/2073-4395/11/9/1880)
Supplement: s1 [file s1]

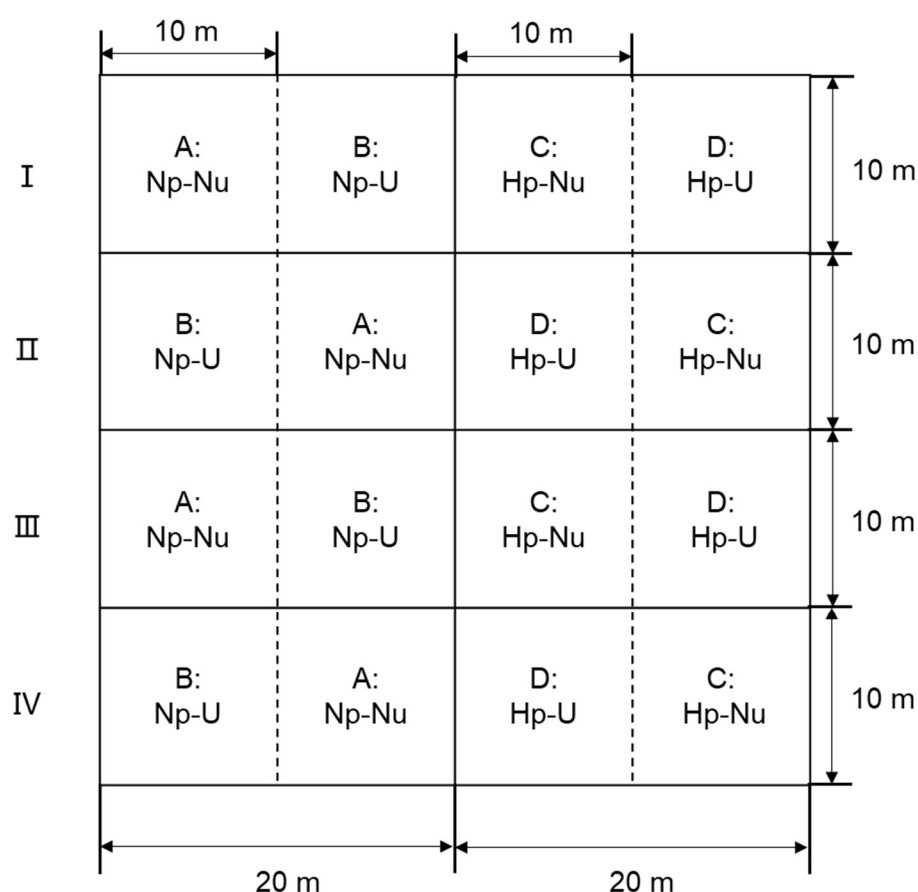

**Figure S1** The experimental design in the field. Two planting density treatments were applied as the main plots, and two plant distribution patterns were designated as sub-plots. The main plot size was 20 m × 10 m, while the sub-plot size was 10 m × 10 m. Hp, high planting density; Np, normal planting density; Nu, non-uniform plant distribution; U, uniform plant distribution. I, II, III, and IV represented four repetitions.

Table S1. Yield and yield components of soybean under different plant distributions.

| Year | Planting density<br>( $10^4$ p ha $^{-1}$ ) | Plant distribution | Harvest density<br>( $10^4$ p ha $^{-1}$ ) | Seed No. per area<br>(m $^{-2}$ ) | Hundred-seed<br>weight<br>(g) | Yield<br>(kg ha $^{-1}$ ) |
|------|---------------------------------------------|--------------------|--------------------------------------------|-----------------------------------|-------------------------------|---------------------------|
| 2018 | Normal planting density                     | Non-uniform        | 17.2 d                                     | 2325 c                            | 15.92 a                       | 3632.9 c                  |
|      |                                             | Uniform            | 17.9 c                                     | 2598 b                            | 15.90 a                       | 3965.1 b                  |
|      | High planting density                       | Non-uniform        | 24.7 b                                     | 2688 b                            | 15.75 a                       | 4142.8 b                  |
|      |                                             | Uniform            | 26.8 a                                     | 3056 a                            | 15.53 a                       | 4582.5 a                  |
| 2019 | Normal planting density                     | Non-uniform        | 17.1 d                                     | 2587 d                            | 16.82 a                       | 3473.7 d                  |
|      |                                             | Uniform            | 17.9 c                                     | 2815 c                            | 16.86 a                       | 3780.1 c                  |
|      | High planting density                       | Non-uniform        | 24.6 b                                     | 3385 b                            | 16.06 b                       | 4545.5 b                  |
|      |                                             | Uniform            | 26.7 a                                     | 3701 a                            | 16.21 b                       | 4970.7 a                  |

The same letters at the same column during one year are not significantly different at  $P < 0.05$  as determined by the least significance difference (LSD) test.
